# Supplementary material for: Detection of Carbapenem Resistance of Proteus mirabilis Strains Isolated from Foxes, Raccoons and Minks in China
Source: MDPI journal article supplement (doi:10.3390/biology11020292), 2022-02-11
Supplement: s1 [file s1]

[illegible]

|     |      |             |   |   |   |   |   |   |   |   |   |   |   |
|-----|------|-------------|---|---|---|---|---|---|---|---|---|---|---|
| F12 | fox  | fece        | + | + | + | + | + | + | + | + | + | + | + |
| F13 | fox  | soil        | + | + | + | + | + | + | + | + | - | + | + |
| F14 | fox  | soil        | + | + | + | + | + | + | + | + | + | + | - |
| F15 | fox  | soil        | + | + | + | + | + | + | + | - | + | + | + |
| F16 | fox  | soil        | + | + | + | + | + | + | + | - | + | + | + |
| F17 | fox  | soil        | + | + | + | + | + | + | + | + | - | + | + |
| F18 | fox  | soil        | + | + | + | + | + | + | + | - | - | + | + |
| F19 | fox  | soil        | + | + | + | + | + | + | + | - | - | + | + |
| F20 | fox  | soil        | + | + | + | + | + | + | + | - | + | + | + |
| F21 | fox  | soil        | + | + | + | + | + | + | + | + | + | + | + |
| F22 | fox  | feed        | + | + | + | + | + | + | + | - | + | + | + |
| M1  | mink | fece        | + | + | + | + | + | + | + | + | + | + | + |
| M2  | mink | fece        | + | + | + | + | + | + | + | - | + | + | + |
| M3  | mink | fece        | + | + | + | + | + | + | + | + | + | + | + |
| M4  | mink | feed        | + | + | + | + | + | + | + | - | + | + | + |
| M5  | mink | fece        | + | + | + | + | + | + | + | - | + | + | + |
| M6  | mink | fece        | + | + | + | + | + | + | + | + | + | + | + |
| M7  | mink | fece        | + | + | + | + | + | + | + | - | + | + | + |
| M8  | mink | throat swab | + | + | + | + | + | + | + | - | + | + | + |
| M9  | mink | throat swab | + | + | + | + | + | + | + | + | + | + | + |
| M10 | mink | throat swab | + | + | + | + | + | + | + | + | - | + | + |
| M11 | mink | anal swab   | + | + | + | + | + | + | + | + | + | + | + |
| M12 | mink | carcass     | + | + | + | + | + | + | + | + | + | - | + |
| M13 | mink | carcass     | + | + | + | + | + | + | + | + | + | - | + |

“+” indicates positive , “-” indicates negative.

Table S2. Characteristics of antibiotic resistance genes of 53 *P. mirabilis* isolates from fur animal farms in this study.

| Strain<br>s | Farms    | Sample<br>type | <i>bla</i><br><i>TEM</i> | <i>blaC</i><br><i>TX-M</i> | <i>bl</i><br><i>a<sub>ps</sub></i><br><i>E</i> | <i>bla</i><br><i>SHV</i> | <i>bla</i><br><i>OXA-1</i> | <i>bla</i><br><i>OXA-23</i> | <i>bla</i><br><i>OXA-24</i> | <i>bla</i><br><i>OXA-51</i> | <i>bla</i><br><i>OXA-58</i> | <i>bla</i><br><i>OXA-48</i> | <i>bla</i><br><i>KPC</i> | <i>bla</i><br><i>NDM</i> | <i>bla</i><br><i>IMP</i> | <i>bl</i><br><i>av</i><br><i>IM</i> | <i>aa</i><br><i>c1</i> | <i>aa</i><br><i>c2</i> | <i>aa</i><br><i>c3</i> | <i>aa</i><br><i>dA</i> | <i>aa</i><br><i>dB</i> | <i>ap</i><br><i>hA</i><br><i>6</i> | <i>qn</i><br><i>rA</i> | <i>qn</i><br><i>rB</i> | <i>qn</i><br><i>rC</i> | <i>qn</i><br><i>rS</i> | <i>oq</i><br><i>xA</i> | <i>aac(6')</i><br><i>-Ib-cr</i> | <i>s</i><br><i>ul</i><br><i>1</i> | <i>s</i><br><i>ul</i><br><i>2</i> | <i>s</i><br><i>ul</i><br><i>3</i> | <i>c</i><br><i>ml</i><br><i>A</i> | <i>fl</i><br><i>o</i><br><i>R</i> |
|-------------|----------|----------------|--------------------------|----------------------------|------------------------------------------------|--------------------------|----------------------------|-----------------------------|-----------------------------|-----------------------------|-----------------------------|-----------------------------|--------------------------|--------------------------|--------------------------|-------------------------------------|------------------------|------------------------|------------------------|------------------------|------------------------|------------------------------------|------------------------|------------------------|------------------------|------------------------|------------------------|---------------------------------|-----------------------------------|-----------------------------------|-----------------------------------|-----------------------------------|-----------------------------------|
| R1          | rac-coon | fece           | +                        | +                          | -                                              | -                        | +                          | -                           | -                           | -                           | -                           | -                           | -                        | -                        | -                        | -                                   | -                      | -                      | -                      | +                      | -                      | -                                  | +                      | -                      | -                      | -                      | -                      | +                               | +                                 | -                                 | +                                 | -                                 | +                                 |
| R2          | rac-coon | fece           | +                        | +                          | -                                              | -                        | +                          | -                           | -                           | -                           | -                           | -                           | -                        | -                        | -                        | -                                   | -                      | -                      | -                      | +                      | -                      | -                                  | +                      | -                      | -                      | -                      | -                      | +                               | +                                 | -                                 | +                                 | -                                 | +                                 |
| R3          | rac-coon | fece           | +                        | -                          | -                                              | -                        | +                          | -                           | -                           | -                           | -                           | -                           | -                        | +                        | -                        | -                                   | -                      | -                      | -                      | +                      | -                      | -                                  | -                      | -                      | -                      | -                      | -                      | +                               | +                                 | -                                 | +                                 | -                                 | +                                 |
| R4          | rac-coon | fece           | +                        | -                          | -                                              | -                        | +                          | -                           | -                           | -                           | -                           | -                           | -                        | -                        | -                        | -                                   | -                      | -                      | -                      | +                      | -                      | -                                  | -                      | -                      | -                      | -                      | -                      | +                               | +                                 | -                                 | +                                 | -                                 | +                                 |
| R5          | rac-coon | fece           | +                        | -                          | -                                              | -                        | +                          | -                           | -                           | -                           | -                           | -                           | -                        | +                        | -                        | -                                   | -                      | -                      | -                      | +                      | -                      | -                                  | -                      | -                      | -                      | -                      | -                      | +                               | +                                 | -                                 | +                                 | -                                 | +                                 |
| R6          | rac-coon | fece           | +                        | -                          | -                                              | -                        | +                          | -                           | -                           | -                           | -                           | -                           | -                        | -                        | -                        | -                                   | -                      | -                      | -                      | +                      | -                      | -                                  | -                      | -                      | -                      | -                      | -                      | +                               | +                                 | -                                 | +                                 | -                                 | +                                 |
| R7          | rac-coon | fece           | +                        | -                          | -                                              | -                        | -                          | -                           | -                           | -                           | -                           | -                           | -                        | -                        | -                        | -                                   | -                      | -                      | -                      | +                      | -                      | -                                  | -                      | -                      | -                      | -                      | -                      | -                               | +                                 | -                                 | +                                 | -                                 | +                                 |
| R8          | rac-coon | fece           | +                        | -                          | -                                              | -                        | +                          | -                           | -                           | -                           | -                           | -                           | -                        | -                        | -                        | -                                   | -                      | -                      | -                      | +                      | +                      | -                                  | -                      | -                      | -                      | -                      | -                      | +                               | +                                 | -                                 | +                                 | -                                 | +                                 |
| R9          | rac-coon | fece           | +                        | +                          | -                                              | -                        | +                          | -                           | -                           | -                           | -                           | -                           | -                        | +                        | -                        | -                                   | -                      | -                      | -                      | +                      | -                      | -                                  | -                      | -                      | +                      | -                      | -                      | +                               | +                                 | -                                 | +                                 | -                                 | +                                 |
| R10         | rac-coon | fece           | +                        | +                          | -                                              | -                        | +                          | -                           | -                           | -                           | -                           | -                           | -                        | +                        | -                        | -                                   | -                      | -                      | -                      | +                      | +                      | -                                  | -                      | -                      | +                      | -                      | -                      | +                               | +                                 | -                                 | +                                 | -                                 | +                                 |
| R11         | rac-coon | fece           | +                        | +                          | -                                              | -                        | +                          | -                           | -                           | -                           | -                           | -                           | -                        | -                        | -                        | -                                   | -                      | -                      | -                      | +                      | -                      | -                                  | -                      | -                      | +                      | -                      | -                      | +                               | +                                 | -                                 | +                                 | -                                 | +                                 |

|     |          |      |   |   |   |   |   |   |   |   |   |   |   |                                   |   |   |   |   |   |   |   |   |   |   |   |   |   |   |   |   |   |   |
|-----|----------|------|---|---|---|---|---|---|---|---|---|---|---|-----------------------------------|---|---|---|---|---|---|---|---|---|---|---|---|---|---|---|---|---|---|
| R12 | rac-coon | fece | + | - | - | - | + | - | - | - | - | - | - | -                                 | - | - | - | - | - | + | - | - | - | - | - | - | + | + | - | - | - | - |
| R13 | rac-coon | fece | + | + | - | - | + | - | - | - | - | - | - | -                                 | - | - | - | - | - | - | - | - | - | - | - | + | + | - | + | - | - |   |
| R14 | rac-coon | fece | + | - | - | - | + | - | - | - | - | - | - | +                                 | - | - | - | - | - | + | + | - | - | - | - | + | + | - | + | - | + |   |
| R15 | rac-coon | fece | + | + | - | - | + | - | - | - | - | - | - | -                                 | - | - | - | - | - | + | - | - | - | - | - | + | + | - | + | - | + |   |
| R16 | rac-coon | soil | + | + | - | - | + | - | - | - | - | - | - | {A<br>hn,<br>201<br>7<br>#67<br>} | - | - | - | - | - | + | + | - | - | - | - | + | + | - | + | - | + |   |
| R17 | rac-coon | soil | + | + | - | - | + | - | - | - | - | - | - | -                                 | - | - | - | - | - | + | - | - | - | - | + | + | - | + | - | + |   |   |
| R18 | rac-coon | soil | + | + | - | - | + | - | - | - | - | - | - | -                                 | - | - | - | - | - | + | - | - | - | - | + | + | - | + | - | + |   |   |
| F1  | fox      | fece | + | - | - | - | + | - | - | - | - | - | - | -                                 | - | - | - | - | - | + | - | - | - | - | - | + | - | - | - | - | + |   |
| F2  | fox      | fece | + | - | - | - | - | - | - | - | - | - | - | -                                 | - | - | - | - | - | + | - | - | - | - | - | + | - | - | - | - | + |   |
| F3  | fox      | fece | + | - | - | - | - | - | - | - | - | - | - | -                                 | - | - | - | - | - | - | - | - | - | - | - | + | - | - | - | - | + |   |
| F4  | fox      | fece | + | - | - | - | - | - | - | - | - | - | - | -                                 | - | - | - | - | - | - | - | - | - | - | + | + | - | - | - | - | + |   |
| F5  | fox      | fece | + | + | - | - | - | - | - | - | - | - | - | -                                 | - | - | - | - | - | + | - | - | - | - | - | - | + | - | + | - | + |   |
| F6  | fox      | fece | + | - | - | - | - | - | - | - | - | - | - | -                                 | - | - | - | - | - | - | - | - | - | - | + | + | - | - | - | - | + |   |
| F7  | fox      | fece | + | + | - | - | + | - | - | - | - | - | - | -                                 | - | - | - | - | - | - | - | - | + | - | - | + | - | + | - | - | + |   |
| F8  | fox      | fece | + | + | - | - | - | - | - | - | - | - | - | -                                 | - | - | - | - | - | - | - | - | - | - | - | + | - | - | - | - | + |   |
| F9  | fox      | fece | + | - | - | - | - | - | - | - | - | - | - | -                                 | - | - | - | - | - | + | - | - | - | - | - | + | - | - | - | - | + |   |
| F10 | fox      | fece | + | - | - | - | - | - | - | - | - | - | - | -                                 | - | - | - | - | - | - | - | - | - | - | - | + | - | - | - | - | + |   |
| F11 | fox      | fece | + | + | - | - | + | - | - | - | - | - | - | -                                 | - | - | - | - | - | + | - | + | - | - | + | + | - | + | - | - | + |   |
| F12 | fox      | fece | + | - | - | - | - | - | - | - | - | - | - | -                                 | - | - | - | - | - | + | - | + | - | - | - | + | - | + | - | - | + |   |
| F13 | fox      | soil | + | - | - | - | - | - | - | - | - | - | - | -                                 | - | - | - | - | - | - | - | + | - | - | - | + | - | - | - | - | + |   |
| F14 | fox      | soil | + | - | - | - | - | - | - | - | - | - | - | -                                 | - | - | - | - | - | + | - | - | - | - | - | + | - | - | - | - | + |   |
| F15 | fox      | soil | + | + | - | - | + | - | - | - | - | - | - | -                                 | - | - | - | - | - | + | - | - | - | - | - | + | + | - | + | - | + |   |

|     |          |                |   |   |   |   |   |   |   |   |   |   |   |   |   |   |   |   |   |   |   |   |   |   |   |   |   |   |   |   |   |   |   |   |
|-----|----------|----------------|---|---|---|---|---|---|---|---|---|---|---|---|---|---|---|---|---|---|---|---|---|---|---|---|---|---|---|---|---|---|---|---|
| F16 | fox      | soil           | + | - | - | - | - | - | - | - | - | - | - | - | + | - | - | - | - | - | + | + | - | - | - | - | - | - | + | + | - | + | - | + |
| F17 | fox      | soil           | + | - | - | - | - | - | - | - | - | - | - | - | - | - | - | - | - | - | + | - | - | - | - | + | - | - | - | + | - | - | - | + |
| F18 | fox      | soil           | + | - | - | - | - | - | - | - | - | - | - | - | - | - | - | - | - | - | + | - | - | - | - | - | - | - | - | + | - | - | - | + |
| F19 | fox      | soil           | + | - | - | - | - | - | - | - | - | - | - | - | - | - | - | - | - | - | + | - | - | - | - | - | - | - | - | + | - | + | - | + |
| F20 | fox      | soil           | + | - | - | - | - | - | - | - | - | - | - | - | - | - | - | - | - | - | + | - | - | - | - | + | - | - | - | + | - | + | - | + |
| F21 | fox      | soil           | + | - | - | - | - | - | + | - | - | - | - | - | - | - | - | - | - | - | + | - | - | + | - | - | - | - | + | + | - | + | - | + |
| F22 | fox      | feed           | + | + | - | - | + | - | + | - | - | - | - | - | - | - | - | - | - | - | + | - | - | - | - | - | - | - | + | + | - | + | - | + |
| M1  | min<br>k | fece           | - | - | + | - | + | - | + | - | - | - | - | - | - | - | - | - | - | - | + | - | - | - | + | - | - | - | + | + | - | + | + | + |
| M2  | min<br>k | fece           | - | - | + | - | + | - | + | - | - | - | - | - | - | - | - | - | + | - | + | - | - | + | - | - | - | - | + | - | + | - | - | - |
| M3  | min<br>k | fece           | - | - | + | - | + | - | - | - | - | - | - | - | - | - | - | - | - | - | + | - | - | - | + | - | - | - | + | + | + | - | - | - |
| M4  | min<br>k | fece           | - | - | + | - | + | - | + | - | - | - | - | - | - | - | - | - | + | - | + | - | - | + | - | - | - | - | + | + | - | - | - | + |
| M5  | min<br>k | fece           | + | - | + | - | + | - | - | - | - | - | - | - | - | - | - | - | - | - | + | - | - | - | + | - | - | - | + | + | + | - | + | + |
| M6  | min<br>k | fece           | - | - | + | - | + | - | - | - | - | - | - | - | - | - | - | - | + | - | + | + | - | - | + | - | - | - | + | + | + | - | - | - |
| M7  | min<br>k | feed           | - | - | + | - | + | - | + | - | - | - | - | - | - | - | - | - | + | - | - | - | - | + | - | - | - | - | + | - | - | - | - | + |
| M8  | min<br>k | throat<br>swab | - | - | + | - | + | - | - | - | - | - | - | - | - | - | - | - | + | - | + | + | - | - | + | - | - | - | + | - | + | - | - | - |
| M9  | min<br>k | throat<br>swab | - | - | + | - | - | - | - | - | - | - | - | - | - | - | - | - | - | - | + | - | - | - | + | - | - | - | + | + | - | - | - | + |
| M10 | min<br>k | throat<br>swab | - | - | + | - | - | - | + | - | - | - | - | - | - | - | - | - | - | - | + | - | + | - | + | - | - | - | + | + | + | - | - | + |
| M11 | min<br>k | anal<br>swab   | + | - | + | - | + | - | - | - | - | - | - | - | - | - | - | - | - | - | + | - | + | - | + | - | - | - | + | + | - | - | - | + |
| M12 | min<br>k | car-<br>cass   | + | - | + | - | + | - | + | - | - | - | - | - | - | - | - | - | - | - | + | - | + | - | - | - | - | - | + | + | - | - | + | - |
| M13 | min<br>k | car-<br>cass   | + | - | + | - | - | - | - | - | - | - | - | - | - | - | - | - | - | - | + | - | - | - | + | - | - | - | + | + | - | - | - | - |

“+” indicates positive, “-” indicates negative.
